# Supplementary material for: CenetBiplot: a new proposal of sparse and orthogonal biplots methods by means of elastic net CSVD
Source: Springer Nature journal article supplement (doi:10.1007/s11634-021-00468-1), 2021-11-20
Supplement: MOESM1 [file 19886834]

**C<sub>enet</sub>Biplot: A new proposal of sparse and orthogonal biplot methods  
by means of elastic net CSVD**

*Advances in Data Analysis and Classification*

**Nerea González-García<sup>1,2</sup>, Ana Belén Nieto-Librero<sup>1,2</sup>, Purificación Galindo-Villardón<sup>1,2</sup>**

<sup>1</sup>Department of Statistics, University of Salamanca, Salamanca, Spain; 37007

<sup>2</sup>Instituto de Investigación Biomédica de Salamanca (IBSAL), Salamanca, Spain; 37007

**Corresponding author**

I. González-García, Nerea

<sup>1</sup>Department of Statistics, University of Salamanca, Salamanca, Spain; 37007:

nerea\_gonzalez\_garcia@usal.es

<sup>2</sup>Instituto de Investigación Biomédica de Salamanca (IBSAL), Salamanca, Spain; 37007

Main Number: (+34) 923294500 ext. 6988

e-mail: [nerea\\_gonzalez\\_garcia@usal.es](mailto:nerea_gonzalez_garcia@usal.es)

## ONLINE RESOURCE 1

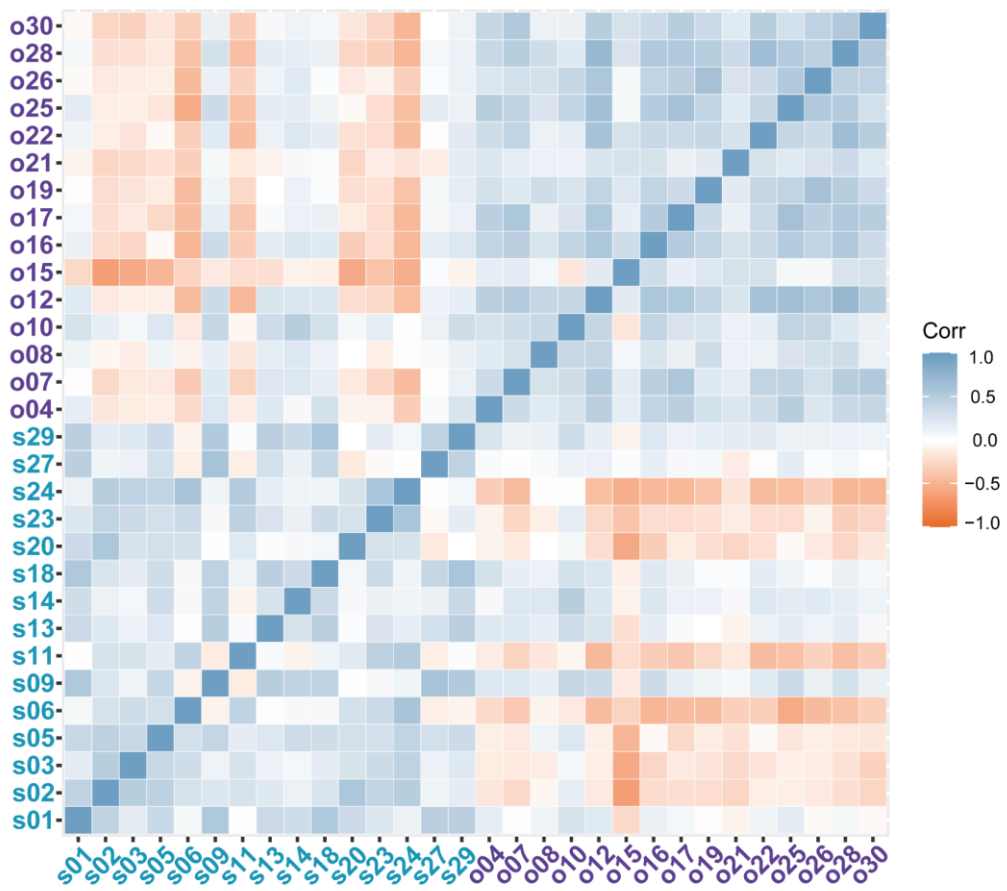

**Fig. 1** Correlation matrix between the items of the OSIQ (object-spatial imagery) questionnaire.
