# Supplementary material for: CenetBiplot: a new proposal of sparse and orthogonal biplots methods by means of elastic net CSVD
Source: Springer Nature journal article supplement (doi:10.1007/s11634-021-00468-1), 2021-11-20
Supplement: MOESM2 [file 19886834]

**C<sub>enet</sub>Biplot: A new proposal of sparse and orthogonal biplot methods  
by means of elastic net CSVD**

*Advances in Data Analysis and Classification*

**Nerea González-García<sup>1,2</sup>, Ana Belén Nieto-Librero<sup>1,2</sup>, Purificación Galindo-Villardón<sup>1,2</sup>**

<sup>1</sup>Department of Statistics, University of Salamanca, Salamanca, Spain; 37007

<sup>2</sup>Instituto de Investigación Biomédica de Salamanca (IBSAL), Salamanca, Spain; 37007

**Corresponding author**

I. González-García, Nerea

<sup>1</sup>Department of Statistics, University of Salamanca, Salamanca, Spain; 37007:

nerea\_gonzalez\_garcia@usal.es

<sup>2</sup>Instituto de Investigación Biomédica de Salamanca (IBSAL), Salamanca, Spain; 37007

Main Number: (+34) 923294500 ext. 6988

e-mail: [nerea\\_gonzalez\\_garcia@usal.es](mailto:nerea_gonzalez_garcia@usal.es)

## ONLINE RESOURCE 2

### A. Geometrical intuition of the possible values for tuning parameter $\tau$ to generate workable solutions

The tuning parameter  $\tau$  must be defined in  $[1, (1 - \alpha)\sqrt{J} + \alpha]$  to obtain a feasible solution of the constrained elastic net optimization problem. The explanation and geometrical intuition for this fact are shown below.

**Lemma 1.** Set  $\mathbf{x} \in \mathbb{R}^J$ ; then:

$$\|\mathbf{x}\|_2 \leq \|\mathbf{x}\|_1 \leq \sqrt{J}\|\mathbf{x}\|_2 \quad (\text{A1})$$

See (Guillemot et al., 2019) to find the Lemma 1 demonstration. Consequently, it is easy to observe that:

$$(1 - \alpha)\|\mathbf{x}\|_2 + \alpha\|\mathbf{x}\|_2^2 \leq (1 - \alpha)\|\mathbf{x}\|_1 + \alpha\|\mathbf{x}\|_2^2 \leq (1 - \alpha)\sqrt{J}\|\mathbf{x}\|_2 + \alpha\|\mathbf{x}\|_2^2 \quad (\text{A2})$$

$$\frac{(1 - \alpha)\|\mathbf{x}\|_2 + \alpha\|\mathbf{x}\|_2^2}{\|\mathbf{x}\|_2} \leq \frac{(1 - \alpha)\|\mathbf{x}\|_1 + \alpha\|\mathbf{x}\|_2^2}{\|\mathbf{x}\|_2} \leq \frac{(1 - \alpha)\sqrt{J}\|\mathbf{x}\|_2 + \alpha\|\mathbf{x}\|_2^2}{\|\mathbf{x}\|_2}$$

$$(1 - \alpha) + \alpha\|\mathbf{x}\|_2 \leq \tau \leq (1 - \alpha)\sqrt{J} + \alpha\|\mathbf{x}\|_2$$

Due to the approach of the constrained problem of optimization, the solution  $\mathbf{x} \in \mathfrak{B}_{\ell_2}(1)$ , and therefore,  $\|\mathbf{x}\|_2 = 1$ . Thus:

$$(1 - \alpha) + \alpha \leq \tau \leq (1 - \alpha)\sqrt{J} + \alpha \quad (\text{A3})$$

As shown in Fig. 5, we restrict  $\tau_1$  and  $\tau_2$  to the range  $1 \leq \tau \leq (1 - \alpha)\sqrt{J} + \alpha$  for any  $\alpha \in [0, 1]$ .

Obviously, if  $\alpha = 1$ ,  $\tau = 1$ , and the solution leads to  $\mathfrak{B}_{\ell_2}(1)$ . If  $\alpha = 0$ , the tuning parameter will be restricted to  $1 \leq \tau \leq \sqrt{J}$ , as evidenced in (Guillemot et al. 2019; Witten et al. 2009).

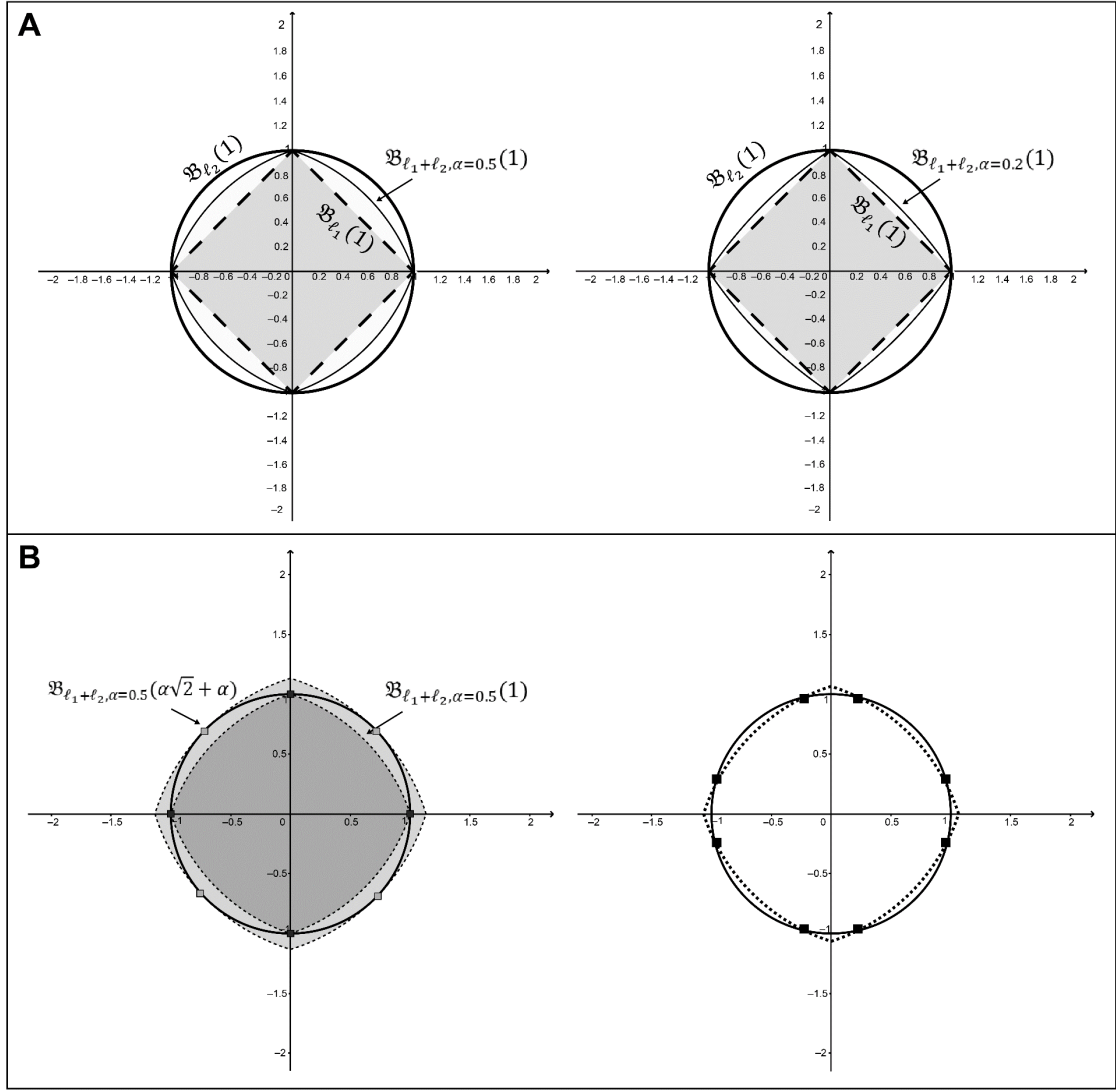

**Fig. 1** A graphical display in  $\mathbb{R}^2$  of the  $\ell_1$ ,  $\ell_2$  and  $\ell_1 + \ell_2$  constraints on a vector  $\mathbf{x}$  for the projection onto the  $\mathfrak{B}_{\ell_1+\ell_2}(\tau) \cap \mathfrak{B}_{\ell_2}(1)$  ball of the  $C_{\text{enet}}\text{SVD}$  procedure. The  $\ell_2$  constraints restrict  $\mathbf{x}$  such that  $\|\mathbf{x}\|_2^2 \leq 1$ , and the  $\ell_1$  region,  $\|\mathbf{x}\|_1 \leq \tau$ . In the case of the elastic net ball constraint,  $\mathbf{x}$  is required to be  $(1 - \alpha)\|\mathbf{x}\|_1 + \alpha\|\mathbf{x}\|_2^2 \leq \tau$ . Panel A shows the  $\mathfrak{B}_{\ell_2}(1)$ ,  $\mathfrak{B}_{\ell_1}(1)$  and  $\mathfrak{B}_{\ell_1+\ell_2}(1)$  ball constraints on different values of  $\alpha$  in the enet ball (left,  $\alpha = 0.5$ ; right,  $\alpha = 0.2$ ). It is shown that the higher the values of  $\alpha$  are, the more similar an enet restriction ball is to the  $\mathfrak{B}_{\ell_2}$  constraint. Panel B (left) reflects the constraints  $(1 - \alpha)\|\mathbf{x}\|_1 + \alpha\|\mathbf{x}\|_2^2 \leq 1$  and  $(1 - \alpha)\|\mathbf{x}\|_1 + \alpha\|\mathbf{x}\|_2^2 \leq (0.5\sqrt{2} + 0.5)$  using dashed lines and  $\|\mathbf{x}\|_2^2 \leq 1$  using a solid circle. The rectangles refer to the possible point solution at the intersection of both restrictions. In panel B (right), feasible solutions for  $1 \leq \tau \leq 0.5\sqrt{J} + 0.5$  are shown ( $J = 2$ ), where the Ridge and enet ball constraints are active.

## B. General solution of the projection onto the $\mathfrak{B}_{\ell_1+\ell_2}(\tau)$ ball

Given  $\mathbf{x} \in \mathbb{R}^J$ , the projection of a vector  $\mathbf{y} = \mathbb{P}_{\tau}^{\mathfrak{B}_{\ell_1+\ell_2}}(\mathbf{x}) \in \mathbb{R}^J$  is defined as the solution of the constrained optimization problem:

$$\mathbf{y} := \mathbb{P}_{\tau}^{\mathfrak{B}_{\ell_1+\ell_2}}(\mathbf{x}) = \left\{ \underset{\mathbf{y} \in \mathbb{R}^J}{\operatorname{argmin}} \frac{1}{2} \|\mathbf{y} - \mathbf{x}\|_2^2 ; s. t. : (1 - \alpha) \|\mathbf{y}\|_1 + \alpha \|\mathbf{y}\|_2^2 \leq \tau \right\} \quad (\text{A4})$$

where  $\alpha \in [0,1]$ . The function  $(1 - \alpha) \|\mathbf{y}\|_1 + \alpha \|\mathbf{y}\|_2^2$  defines the elastic net penalty as a convex combination of the Lasso and Ridge convex penalties, possessing the optimal properties of both operators. Assume that  $\mathbf{x} \geq 0$  is necessary to construct the dual optimization problem from the Lagrange function associated with  $\lambda \geq 0$ :

$$\operatorname{Argmax} L(\mathbf{y}, \lambda) = \frac{1}{2} \|\mathbf{y} - \mathbf{x}\|_2^2 + \lambda(1 - \alpha) \|\mathbf{y}\|_1 + \alpha \lambda \|\mathbf{y}\|_2^2 - \lambda \tau \quad (\text{A5})$$

The constrained sparse vector solution  $\mathbf{y} := \mathbb{P}_{\tau,1}^{\mathfrak{B}_{\ell_1+\ell_2} \cap \mathfrak{B}_{\ell_2}}(\mathbf{x})$  of the previous optimization problem is determined by:

$$\begin{aligned} \mathbf{y} &= \operatorname{Proj}_{\lambda(\alpha \|\cdot\|_1 + (1-\alpha) \|\cdot\|_2^2)}(\mathbf{x}) = \left( \operatorname{Proj}_{\lambda \alpha \|\cdot\|_2^2} \circ \operatorname{Proj}_{\lambda(1-\alpha) \|\cdot\|_1} \right)(\mathbf{x}) \\ &= \frac{\operatorname{sign}(\mathbf{x}_j)(|\mathbf{x}_j| - \lambda(1 - \alpha))_+}{1 + 2\lambda\alpha} = \frac{S_{\lambda(1-\alpha)}(\mathbf{x})}{1 + 2\lambda\alpha} \end{aligned} \quad (\text{A6})$$

with  $S_{\lambda(1-\alpha)}(\mathbf{x})$  being the soft-thresholding operator.

## C. Projection onto the $\mathfrak{B}_{\ell_1+\ell_2}(\tau) \cap \mathfrak{B}_{\ell_2}(1)$ ball

Given  $\mathbf{x} \in \mathbb{R}^J$ , the projection of a vector  $\mathbf{y} = \mathbb{P}_{\tau,1}^{\mathfrak{B}_{\ell_1+\ell_2} \cap \mathfrak{B}_{\ell_2}}(\mathbf{x}) \in \mathbb{R}^J$  is defined as the solution of the constrained optimization problem:

$$\mathbf{y} := \mathbb{P}_{\tau,1}^{\mathfrak{B}_{\ell_1+\ell_2} \cap \mathfrak{B}_{\ell_2}}(\mathbf{x}) = \left\{ \underset{\mathbf{y} \in \mathbb{R}^J}{\operatorname{argmin}} \frac{1}{2} \|\mathbf{y} - \mathbf{x}\|_2^2 ; s. t. : (1 - \alpha) \|\mathbf{y}\|_1 + \alpha \|\mathbf{y}\|_2^2 \leq \tau, \|\mathbf{y}\|_2 \leq 1 \right\} \quad (\text{A7})$$

We extend the algorithm proposed for the projection onto the intersection of the L1 and L2 balls (Guillemot et al., 2019) to the function:

$$\Omega(\lambda) = \frac{(1 - \alpha) \|S_{\lambda(1-\alpha)}^*(\tilde{\mathbf{x}})\|_1 + \alpha \|S_{\lambda(1-\alpha)}^*(\tilde{\mathbf{x}})\|_2^2}{\|S_{\lambda(1-\alpha)}^*(\tilde{\mathbf{x}})\|_2} \quad (\text{A8})$$

where  $\tilde{\mathbf{x}} = (\tilde{x}_1, \tilde{x}_2, \dots, \tilde{x}_j)$  is a vector composed of the absolute values of  $\mathbf{x}$ , ordered in a decreasing way, and

$$S_{\lambda(1-\alpha)}^*(\tilde{\mathbf{x}}) = \frac{S_{\lambda(1-\alpha)}(\tilde{\mathbf{x}})}{1 + 2\lambda\alpha} \quad (\text{A9})$$

$\Omega(\lambda)$  is a continuous and decreasing function from  $\Omega(0) = ((1 - \alpha)\|\tilde{\mathbf{x}}\|_1 + \alpha\|\tilde{\mathbf{x}}\|_2^2)/\|\tilde{\mathbf{x}}\|_2$  to  $\Omega(\tilde{x}_1) = 0$ . Due to the properties of  $\Omega$ , there is a positive scalar  $\lambda > 0$  such that  $\Omega(\lambda) = \tau$ , with  $\lambda \in [\tilde{x}_1, \tilde{x}_j]$  and  $\tau \in [\Omega(\tilde{x}_1), \Omega(0)]$ . Thus,  $\forall \tau \in [\Omega(\tilde{x}_1), \Omega(0)] = [1, (1 - \alpha)\sqrt{J} + \alpha\|\tilde{\mathbf{x}}\|_2]$  exists with  $k \in \mathbb{Z}$ ,  $k \leq J$ , such that

$$\Omega(\tilde{\mathbf{x}}_k) \leq \tau < \Omega(\tilde{\mathbf{x}}_{k+1}) \quad (\text{A10})$$

Due to the  $\ell_1$ ,  $\ell_2$  and  $\ell_1 + \ell_2$  norm formulation and basic algebraic operations, determining the value of  $\lambda$  that verifies  $\Omega(\lambda) = \tau$  is equivalent to finding  $\lambda \in [\tilde{x}_1, \tilde{x}_j]$  as the solution to a fourth-degree polynomial equation:

$$\begin{aligned} & (\tau^2 l_2 - \alpha^2 l_2^2 - 2\alpha l_1 l_2 (1 - \alpha) - l_1^2 (1 - \alpha)^2) + \lambda \\ & \cdot (4\alpha l_2 \tau^2 - 2\tau^2 l_1 (1 - \alpha) + 2k l_2 \alpha (1 - \alpha)^2 + 2k l_1 (1 - \alpha)^3) + \lambda^2 \\ & \cdot (k\tau^2 (1 - \alpha)^2 + 4\alpha^2 l_2 \tau^2 - 8\alpha\tau^2 (1 - \alpha) l_1 + 2l_1 k \alpha (1 - \alpha)^3) \\ & + 2l_2 k \alpha^2 (1 - \alpha)^2 - k^2 (1 - \alpha)^4) + \lambda^3 \\ & \cdot (4k\alpha\tau^2 (1 - \alpha)^2 - 2k^2 \alpha (1 - \alpha)^4 - 8\alpha^2 \tau^2 (1 - \alpha) l_1) + \lambda^4 \\ & \cdot (4k\alpha^2 \tau^2 (1 - \alpha)^2 - k^2 \alpha^2 (1 - \alpha)^4) = 0 \end{aligned} \quad (\text{A11})$$

with  $l_1 = \sum_{i=1}^k \tilde{\mathbf{x}}_i$  and  $l_2 = \sum_{i=1}^k \tilde{\mathbf{x}}_i^2$ . Once  $\lambda$  is found, the vector solution  $\mathbf{y} =$

$\mathbb{P}_{\tau,1}^{\mathbb{B}_{\ell_1+\ell_2} \cap \mathbb{B}_{\ell_2}}(\mathbf{x}) \in \mathbb{R}^J$  corresponds to:

$$\mathbf{y} = \frac{S_{\lambda(1-\alpha)}(\tilde{\mathbf{x}})}{1 + 2\lambda\alpha} \quad (\text{A12})$$

The whole process is summarized as a four-step method:

1. Compute the vector  $\tilde{\mathbf{x}}$  of  $\mathbf{x}$  coefficients ordered as absolute values.
2. Find  $k$  that verifies (A5).
3. Calculate  $\lambda$  as the solution to (A6).
4. Determine the solution (A12).

Table S1 displays the pseudocode for an efficient projection of  $\mathbf{x}$  onto the  $\mathfrak{B}_{\ell_1+\ell_2}(\tau) \cap \mathfrak{B}_{\ell_2}(1)$  constraint. Lines 13 to 20 and 28-29 are modified from Guillemot et al (2019) to address the problem of projection onto the intersection of the elastic net and  $\ell_2$  norm balls.

**Table S1.** Projection onto the  $\mathfrak{B}_{\ell_1+\ell_2} \cap \mathfrak{B}_{\ell_2}$  space algorithm

| <b>Projection of a vector onto <math>\mathfrak{B}_{\ell_1+\ell_2}(\tau) \cap \mathfrak{B}_{\ell_2}(1)</math></b> |                                                                                                                             |
|------------------------------------------------------------------------------------------------------------------|-----------------------------------------------------------------------------------------------------------------------------|
| <b>Input:</b>                                                                                                    | $\mathbf{x} \in \mathbb{R}^J, \tau \in \mathbb{R}, \tau \in [1, \sqrt{J}]$                                                  |
| <b>Output</b>                                                                                                    | $\mathbf{y} = P_{\tau}^{\mathfrak{B}_{\ell_1+\ell_2} \cap \mathfrak{B}_{\ell_2}}(\mathbf{x})$                               |
| <b>Initialization:</b>                                                                                           | $s_1 = 0, s_2 = 0, nb = 0, p =  \mathbf{x}^* $<br>being $\mathbf{x}^* = \{x_i \in \mathbf{x}, i = 1, \dots, J/x_i \neq 0\}$ |
| 1:                                                                                                               | <b>If</b> $\ \mathbf{x}\ _2 = 0$ <b>then</b> $\mathbf{x} = \mathbf{v}$                                                      |
| 2:                                                                                                               | <b>If</b> $\ \mathbf{x}\ _1/\ \mathbf{x}\ _2 \leq \tau$ <b>then</b> $\mathbf{y} = \mathbf{x}$                               |
| 3:                                                                                                               | <b>Else</b>                                                                                                                 |
| 4:                                                                                                               | <b>While</b> TRUE <b>do</b> :                                                                                               |
| 5:                                                                                                               | $N = \text{length}(p)$                                                                                                      |
| 6:                                                                                                               | Randomly select $r \in \{1, \dots, N\}$ with $\tilde{x}_r \neq \max(p)$                                                     |
| 7:                                                                                                               | $\tilde{x}_k = p[r]$                                                                                                        |
| 8:                                                                                                               | # Split $p$ into two disjoint sets:<br>$H = \{p_j / p_j < \tilde{x}_k\}$<br>$L = \{p_j / p_j > \tilde{x}_k\}$               |
| 9:                                                                                                               | # Compute $k$ as:<br>$nb_{\tilde{x}_k} = \text{length}(\{p_j / e p_j == \tilde{x}_k\})$                                     |
| 10:                                                                                                              | $k = nb + \text{length}(L) + nb_{\tilde{x}_k}$                                                                              |
| 11:                                                                                                              | $s_{low_1} = \sum_{i \in L} p_i + nb_{\tilde{x}_k} \cdot \tilde{x}_k$                                                       |
| 12:                                                                                                              | $s_{low_2} = \sum_{i \in L} p_i^2 + nb_{\tilde{x}_k} \cdot \tilde{x}_k^2$                                                   |

13: 
$$\Omega(\tilde{x}_k) = \frac{\alpha(s_2 + s_{low_2}) + (1 - \alpha)(s_1 + s_{low_1}) - k\tilde{x}_k(1 - \alpha)^2 - k\tilde{x}_k^2\alpha(1 - \alpha)^2}{(1 + 2\alpha\tilde{x}_k)\sqrt{(s_2 + s_{low_2}) - 2\tilde{x}_k(1 - \alpha)(s_1 + s_{low_1}) + k\tilde{x}_k^2(1 - \alpha)^2}}$$

14: **If**  $\Omega(\tilde{x}_k) > \tau$  **then**

15:       **If**  $L = \emptyset$  **end**

16:       Update  $p$ :  $p = \{p_i\}_{i \in L}$

17:       **Else**

18:        $\tilde{x}_{k+1} = \max(\{p_i\}_{i \in H})$

19:        $\Omega(\tilde{x}_{k+1})$

$$= \frac{\alpha(s_2 + s_{low_2}) + (1 - \alpha)(s_1 + s_{low_1}) - k\tilde{x}_{k+1}(1 - \alpha)^2 - k\tilde{x}_{k+1}^2\alpha(1 - \alpha)^2}{(1 + 2\alpha\tilde{x}_{k+1})\sqrt{(s_2 + s_{low_2}) - 2\tilde{x}_{k+1}(1 - \alpha)(s_1 + s_{low_1}) + k\tilde{x}_{k+1}^2(1 - \alpha)^2}}$$

20:       **If**  $\Omega(\tilde{x}_{k+1}) > \tau$  **end**

21:       Update  $p$ :  $p = \{p_i\}_{i \in H}$

22:       Update  $nb$ :  $nb = k$

23:       Update  $s_1$ :  $s_1 = s_1 + s_{low_1}$

24:       Update  $s_2$ :  $s_2 = s_2 + s_{low_2}$

25:       **end**

26: **end**

27:  $l_1 = s_1 + s_{low_1}$

$l_2 = s_2 + s_{low_2}$

28: #Calculate  $\lambda$ :

$$(\alpha^2 l_2^2 + 2\alpha l_2(1 - \alpha)l_1 + (1 - \alpha)^2 l_1^2 - \tau^2 l_2) + \lambda$$

$$\cdot (4\alpha l_2 \tau^2 - 2l_2 k[\alpha - 2\alpha^2 + \alpha^3] - 2l_1 k[1 - 3\alpha + 3\alpha^2 - \alpha^3]$$

$$- 2\tau^2(1 - \alpha)l_1) + \lambda^2$$

$$\cdot (k^2(1 - \alpha)^4 + 4\alpha^2 l_2 \tau^2 + k\tau^2(1 - \alpha)^2 - 2l_2 k[\alpha^2 - 2\alpha^3 + \alpha^4]$$

$$- 2l_1 k[\alpha - 3\alpha^2 + 3\alpha^3 - \alpha^4] - 8\alpha\tau^2(1 - \alpha)l_1) + \lambda^3$$

$$\cdot (4k\alpha\tau^2(1 - \alpha)^2 - 2k^2\alpha(1 - \alpha)^4 - 8\alpha^2\tau^2(1 - \alpha)l_1) + \lambda^4$$

$$\cdot (4k\alpha^2\tau^2(1 - \alpha)^2 - k^2\alpha^2(1 - \alpha)^4) = 0$$

29: #Solution:

$$\mathbf{y} := \frac{S_\lambda^*(\mathbf{x})}{\|\mathbf{x}\|_2} = \frac{\frac{S_\lambda(\mathbf{x})}{1 + \lambda\gamma}}{\|\mathbf{x}\|_2} = \frac{\text{sign}(\mathbf{x})(|\mathbf{x}| - \lambda(1 - \alpha), 0)_+}{\|\mathbf{x}\|_2}$$

30: **end**

---
